# Supplementary material
Source: Springer Nature journal article supplement (https://www.springermedizin.de/resource/supplementary/12931_2011_1160_MOESM1_ESM.pdf/9425434)

## Frequent Exacerbations

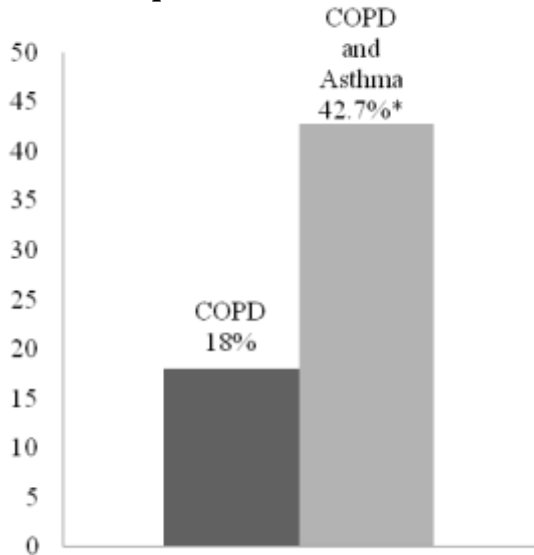

## Severe Exacerbations

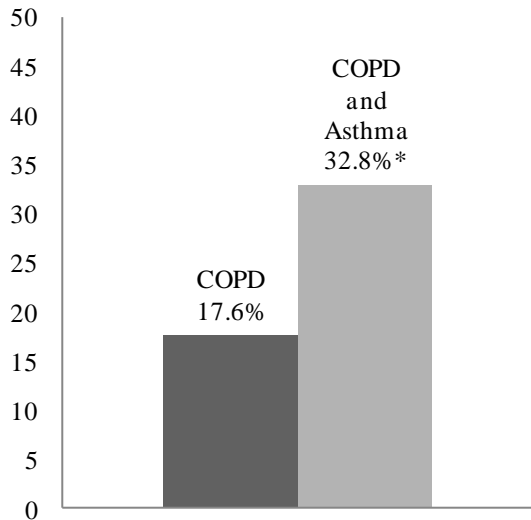

Supplement: MOESM1 [file 9425434]
